# Supplementary material for: Collection of Monoclonal Antibodies Targeting SARS-CoV-2 Proteins
Source: MDPI journal article supplement (doi:10.3390/v14020443), 2022-02-21
Supplement: s1 [file s1]

## Supplementary Data

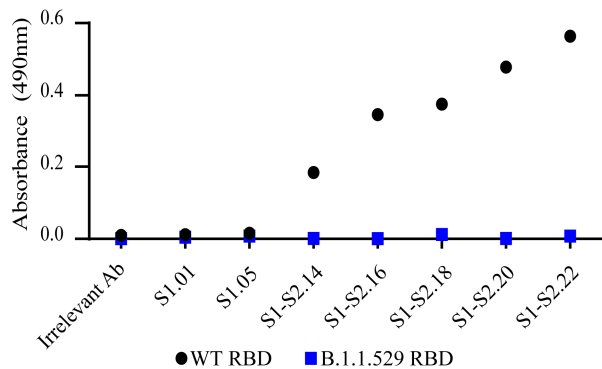

**Supplementary Figure S1.** ELISA test of anti-Spike monoclonal antibodies raised against recombinant full WT S1-S2 protein for binding of WT RBD and mutated RBD protein corresponding to B.1.1.529 (Omicron) variant. ELISA plates were coated with 2ug/ml of WT- or Omicron-RBD.

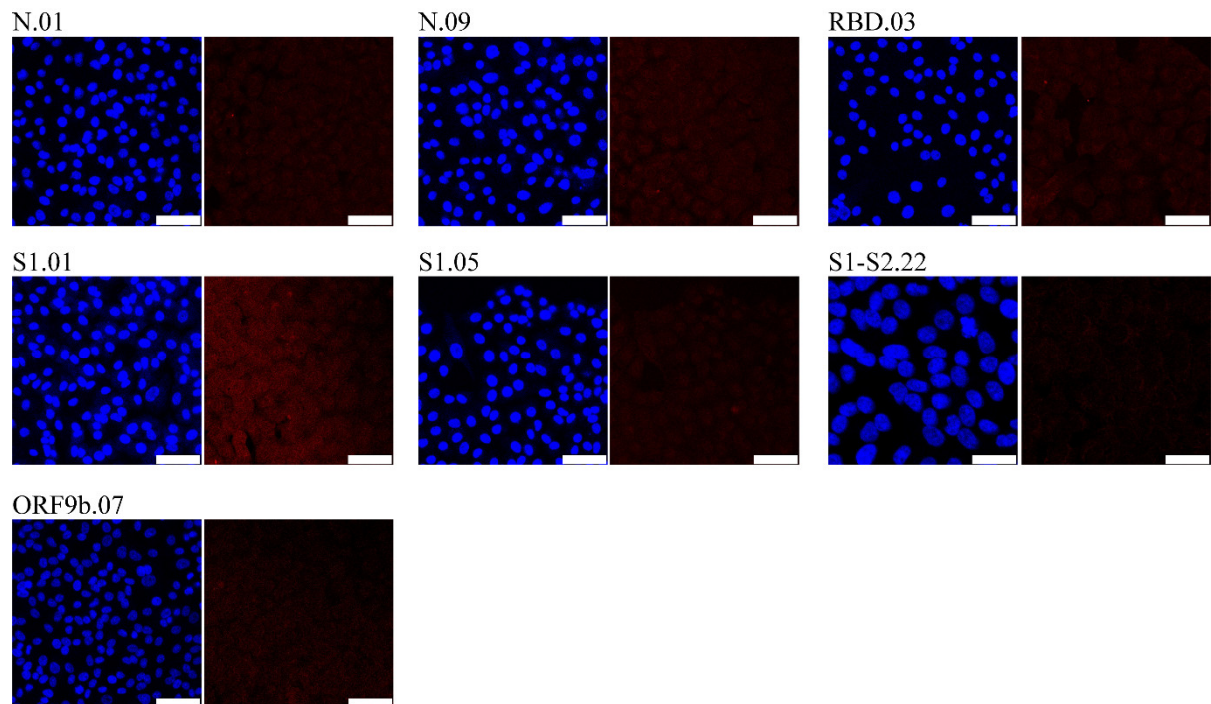

**Supplementary Figure S2.** Testing anti-SARS-CoV-2 mAbs on mock infected cells by confocal microscopy. Mock infected cells were stained with respective monoclonal antibodies following secondary TRITC-coupled antibodies (red) and nuclei staining by DAPI (blue). Images were obtained using Leica confocal microscope. The size bar (white line) corresponds to 50  $\mu$ m. Tested mAb clones are indicated above the panel.

**Supplementary Table S1:** Sequences of RBD domains of SARS-CoV-2 Spike protein in indicated recombinant proteins.

| SARS-Cov-2 virus/variant                                              | RBD aminoacid sequence in recombinant protein (mutations are indicated in <b>bold red</b> )                                                                                                                                                                                                                                                |
|-----------------------------------------------------------------------|--------------------------------------------------------------------------------------------------------------------------------------------------------------------------------------------------------------------------------------------------------------------------------------------------------------------------------------------|
| Wild-type, Wuhan<br>NCBI ref.seq.<br>YP_009724390.1<br>region 319-541 | RVQPTESIVRFPNITNLCPFGEVFNATRFASVYA<br>WNRKRISNCVADYSVLYNSASFSTFKCYGVSP<br>KLNDLCFTNVYADSFVIRGDEVQRQIAPGQTGKI<br>ADYNYKLPDDFTGCVIAWNSNNLDSKVGGNY<br>NYLYRLFRKSNLKPFERDISTEIQAGSTPCNGV<br>EGFNCYFPLQSYGFQPTNGVGYQPYRVVLSFE<br>LLHAPATVCGPKKSTNLVKNKCVNF                                                                                      |
| B.1.351                                                               | RVQPTESIVRFPNITNLCPFGEVFNATRFASVYA<br>WNRKRISNCVADYSVLYNSASFSTFKCYGVSP<br>KLNDLCFTNVYADSFVIRGDEVQRQIAPGQTG <b>NI</b><br>ADYNYKLPDDFTGCVIAWNSNNLDSKVGGNY<br>NYLYRLFRKSNLKPFERDISTEIQAGSTPCNGV<br><b>K</b> GFNCYFPLQSYGFQPT <b>Y</b> GVGYQPYRVVLSFE<br>LLHAPATVCGPKKSTNLVKNKCVNF                                                             |
| B.1.617                                                               | RVQPTESIVRFPNITNLCPFGEVFNATRFASVYA<br>WNRKRISNCVADYSVLYNSASFSTFKCYGVSP<br>KLNDLCFTNVYADSFVIRGDEVQRQIAPGQTGKI<br>ADYNYKLPDDFTGCVIAWNSNNLDSKVGGNY<br>NY <b>R</b> YRLFRKSNLKPFERDISTEIQAGSTPCNGV<br><b>Q</b> GFNCYFPLQSYGFQPTNGVGYQPYRVVLSF<br>ELLHAPATVCGPKKSTNLVKNKCVNF                                                                     |
| B.1.617.2                                                             | RVQPTESIVRFPNITNLCPFGEVFNATRFASVYA<br>WNRKRISNCVADYSVLYNSASFSTFKCYGVSP<br>KLNDLCFTNVYADSFVIRGDEVQRQIAPGQTGKI<br>ADYNYKLPDDFTGCVIAWNSNNLDSKVGGNY<br>NY <b>R</b> YRLFRKSNLKPFERDISTEIQAGS <b>K</b> PCNG<br>VEGFNCYFPLQSYGFQPTNGVGYQPYRVVLS<br>FELLHAPATVCGPKKSTNLVKNKCVNF                                                                    |
| B.1.1.529                                                             | RVQPTESIVRFPNITNLCPF <b>D</b> EVFNATRFASVYA<br>WNRKRISNCVADYSVLYN <b>LAPFF</b> TFKCYGVSP<br>KLNDLCFTNVYADSFVIRGDEVQRQIAPGQTG <b>NI</b><br>ADYNYKLPDDFTGCVIAWNSN <b>K</b> LDSKV <b>S</b> GNY<br>NYLYRLFRKSNLKPFERDISTEIQAGN <b>K</b> PCNG<br><b>VAG</b> FNCFPL <b>KSY</b> <b>SFRPT</b> <b>Y</b> GVGHQPYRVVLSF<br>ELLHAPATVCGPKKSTNLVKNKCVNF |

**Supplementary Table S2:** Immunogen description and resulting mAb clones

| Protein                 | Immunogen<br>(range of<br>aminoacid<br>sequence) * | Tag                  | Vector/expression<br>system       | In silico<br>predicted<br>molecular<br>weight ** | Resulting<br>mAb clones                 |
|-------------------------|----------------------------------------------------|----------------------|-----------------------------------|--------------------------------------------------|-----------------------------------------|
| Nucleocapsid<br>protein | 1 –419                                             | C-term 6x<br>HIS tag | pET22b+,<br>E.coli<br>BL21 pREP4  | 45,6 kDa                                         | N.01-N.13                               |
| RBD                     | 319-541                                            | C-term 6x<br>HIS tag | pCAGGS,<br>HEK293T                | 25 kDa                                           | RBD.01-<br>RBD.07                       |
| S1-S2                   | 14–1208                                            | C-term 6x<br>HIS tag | pOpiE2, High<br>Five insect cells | 132 kDa                                          | S1.01, S1.05,<br>S1-S2.14 –<br>S1.S2.22 |
| Nsp1                    | 1-180                                              | C-term 6x<br>HIS tag | pET22b+,<br>E.coli<br>BL21 pREP4  | 19,8 kDa                                         | Nsp1.01-<br>Nsp1.03                     |
| Nsp7                    | 1-83                                               | C-term 6x<br>HIS tag | pET22b+,<br>E.coli<br>BL21 pREP4  | 9,2 kDa                                          | Nsp7.01-<br>Nsp7.03                     |
| Nsp8                    | 1-198                                              | C-term 6x<br>HIS tag | pET22b+,<br>E.coli<br>BL21 pREP4  | 21,9 kDa                                         | Nsp8.01-<br>Nsp8.03                     |
| Nsp9                    | 1-113                                              | N-term 6x<br>HIS tag | pET22b+,<br>E.coli<br>BL21 pREP4  | 12,4 kDa                                         | Nsp9.01                                 |
| Nsp10                   | 1-138                                              | N-term 6x<br>HIS tag | pET22b+,<br>E.coli<br>BL21 pREP4  | 14,8 kDa                                         | Nsp10.01-<br>Nsp10.03                   |
| Nsp16                   | 1-298                                              | N-term 6x<br>HIS tag | pET22b+,<br>E.coli<br>BL21 pREP4  | 33,3 kDa                                         | Nsp16.01-<br>Nsp16.07                   |
| ORF9b                   | 1-97                                               | C-term 6x<br>HIS tag | pET22b+,<br>E.coli<br>BL21 pREP4  | 10,8 kDa                                         | ORF9b.01-<br>ORF9b.07                   |

\* NCBI NC\_045512.2 was used as reference sequence \*\*predicted molecular weight based on aminoacid sequence choosed for cloning (without tags or signal sequences)

**Supplementary Table S3:** Performance of anti-Spike antibodies in different techniques on variant Spike/RBD proteins or variant SARS-CoV-2 infected cells

| Method   | ELISA   |         |           |            | Flow cytometry |         |           | IF        |
|----------|---------|---------|-----------|------------|----------------|---------|-----------|-----------|
| Variant  | B.1.617 | B.1.351 | B.1.617.2 | B.1.1.529* | B.1.1.7        | B.1.351 | B.1.617.2 | B.1.617.2 |
| RBD.01   | +       | +       | +         | +          | +              | +       | +         | ND        |
| RBD.03   | +       | -       | +         | -          | ND             | ND      | ND        | +         |
| RBD.05   | -       | -       | -         | -          | ND             | ND      | ND        | ND        |
| RBD.07   | -       | -       | -         | -          | ND             | ND      | ND        | ND        |
| S1.01    | +       | +       | +         | -          | +              | +       | +         | +         |
| S1.05    | +       | +       | +         | -          | ND             | ND      | ND        | +         |
| S1-S2.14 | +       | +       | +         | -          | ND             | ND      | ND        | ND        |

|          |    |    |    |    |    |    |    |    |
|----------|----|----|----|----|----|----|----|----|
| S1-S2.15 | ND |
| S1-S2.16 | +  | +  | +  | -  | ND | ND | ND | ND |
| S1-S2.17 | ND |
| S1-S2.18 | +  | +  | +  | -  | ND | ND | ND | ND |
| S1-S2.19 | ND |
| S1-S2.20 | +  | +  | +  | -  | ND | ND | ND | ND |
| S1-S2.21 | ND |
| S1-S2.22 | +  | +  | +  | -  | ND | ND | ND | -  |

\* mutated RBD protein, other variants used in ELISA are full Spike protein
